# Supplementary material for: Immunological Analysis of People in Northeast China after SARS-CoV-2 Inactivated Vaccine Injection
Source: MDPI journal article supplement (doi:10.3390/vaccines9091028), 2021-09-16
Supplement: s1 [file s1]

**Table S1 Seroconversion rate compared with literatures**

|           | Seroconversion rate in this study |       | Seroconversion rate in literatures |                           |
|-----------|-----------------------------------|-------|------------------------------------|---------------------------|
|           | D14                               | D42   | D14                                | D28                       |
| Sinovas   | 50%                               | 85%   | 92.4% <sup>[7]</sup>               | 94.1-97.4% <sup>[7]</sup> |
| Sinopharm | 83.3%                             | 58.3% | 75% <sup>[8]</sup>                 | 100% <sup>[8]</sup>       |
